# Supplementary material
Source: Springer Nature journal article supplement (https://www.springermedizin.de/resource/supplementary/12889_2014_6709_MOESM1_ESM.pdf/9498848)
Supplement: MOESM1 [file 9498848]

Community-dwelling, transitionally frail older adults aged 70-85 from the Dutch province of Groningen

**Recruitment:**

- Participant information obtained by researchers
- Screening for eligibility by telephone
  - Personal characteristics (short)
  - GFI

**INTERVENTION**

Baseline assessment  $T_0$  (Target N = 50) **Week 0**

- Questionnaires
  - Participant characteristics (full version)
  - FES-I
- Functional tests
  - STS, TUG, FTSS

Baseline assessment **Week 0-1**

- Week of wearing sensor in daily life

Start of intervention **Week 1**

- Phone call with SQUASH questionnaire
- Next, start training

Intervention Part 1 **Week 2-14**

- With weekly phone call

Intermediate assessment  $T_1$  **Week 14**

- Questionnaires
  - FES-I, SQUASH, User evaluation
- Functional tests
  - STS, TUG, FTSS
- Adherence
- Daily activity based on sensor data

Intervention Part 2 **Week 15-27**

- Without weekly phone call

Follow-up assessment  $T_2$  **Week 27**

- Questionnaires
  - FES-I, SQUASH, User evaluation
- Functional tests
  - STS, TUG, FTSS
- Adherence
- Daily activity based on sensor data

**END OF STUDY**
